# Supplementary material for: Behavioral and biological alterations following transplantation of ASD-associated gut microbiota in mice
Source: PeerJ journal article supplement (doi:10.7717/peerj.20951), 2026-03-24

**Full-length, uncropped Western blot images.**

Full-length Western blot membranes showing IBA-1 or GFAP together with the loading control GAPDH, detected on the same membrane using hippocampal protein lysates from TD-FMT and ASD-FMT mice. These images correspond to the Western blot data quantified in Figure 7 of the main manuscript. The bands used for densitometric quantification in Figure 7 were derived from these full-length membranes.

**(A) IBA-1**

Full-length Western blot membrane showing IBA-1 and GAPDH expression in hippocampal samples from TD-FMT and ASD-FMT mice.

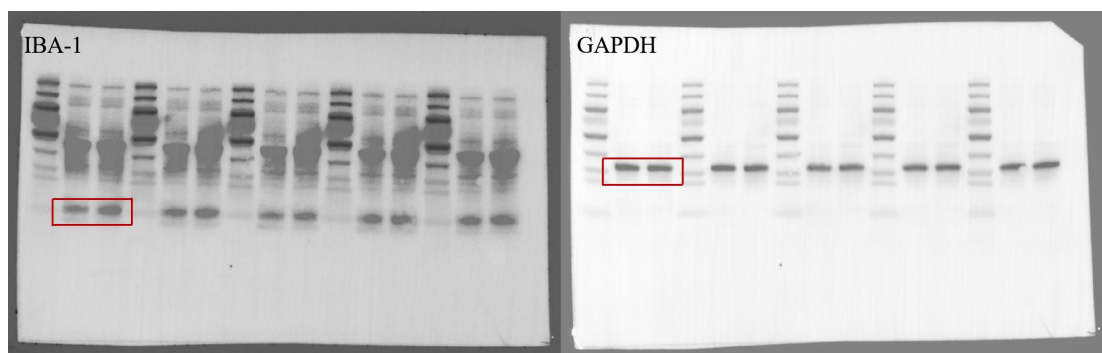

**(B) GFAP**

Full-length Western blot membrane showing GFAP and GAPDH expression in hippocampal samples from TD-FMT and ASD-FMT mice.

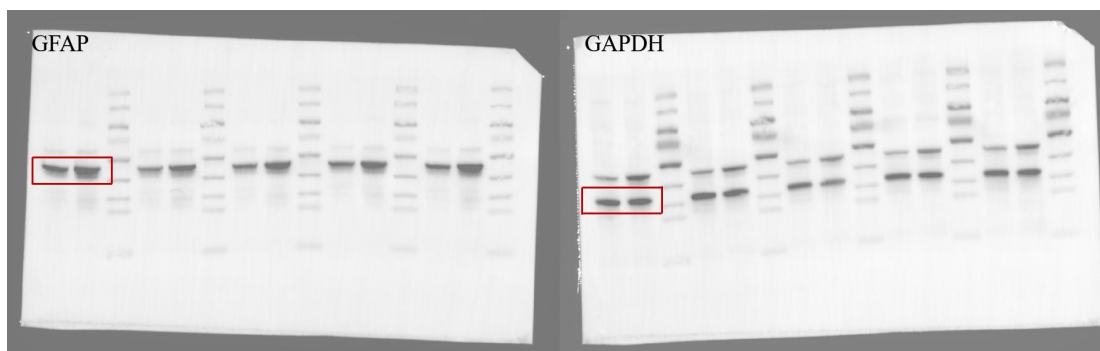

Supplement: Supplement_7.pdf [file Supplement_7.pdf]
